# Supplementary material
Source: HighWire-hosted journal article supplement (https://mbio.asm.org/content/12/1/e02684-20)

Supplementary Figure 7

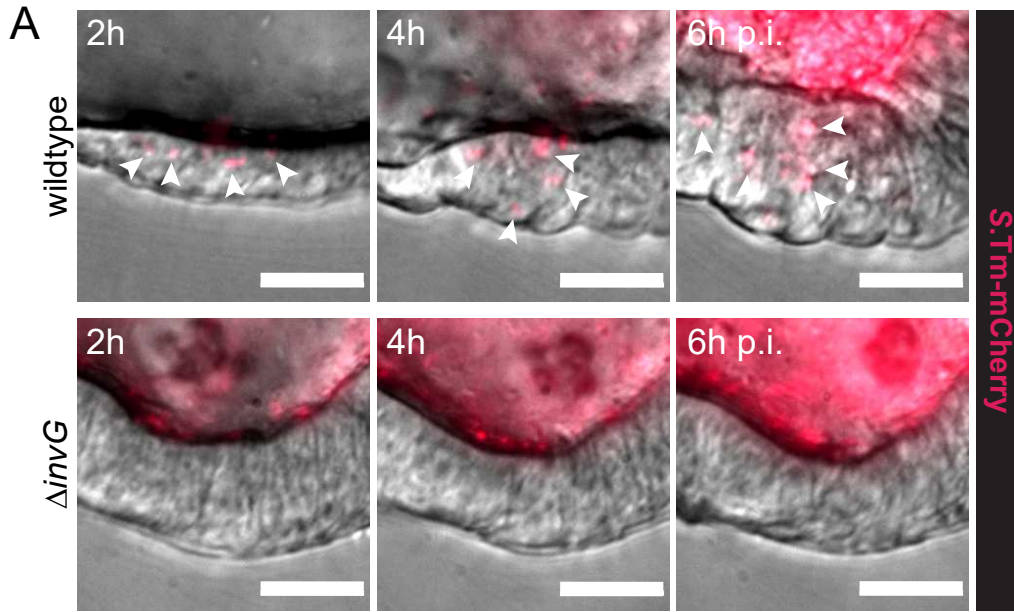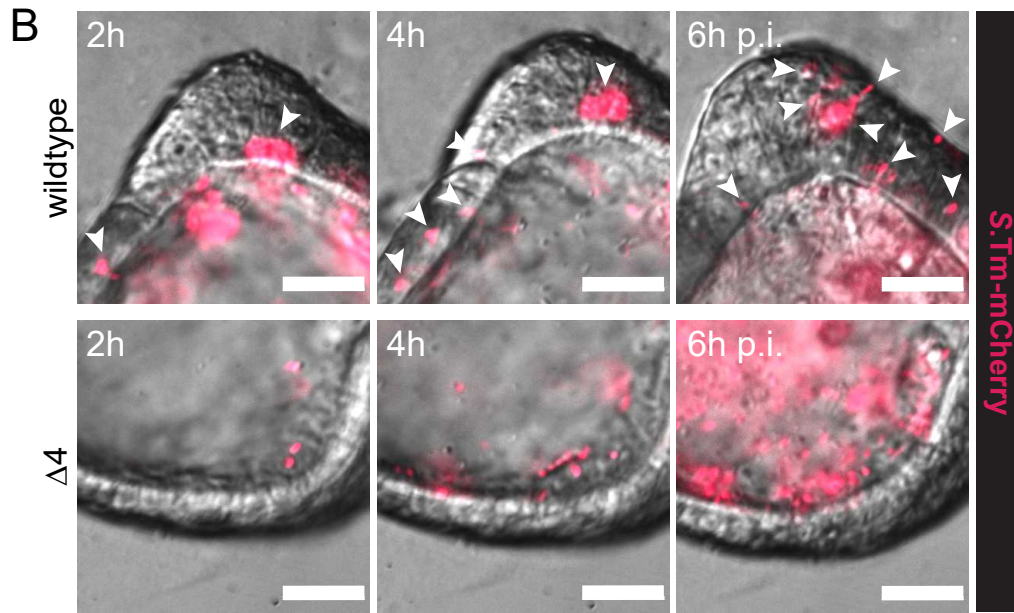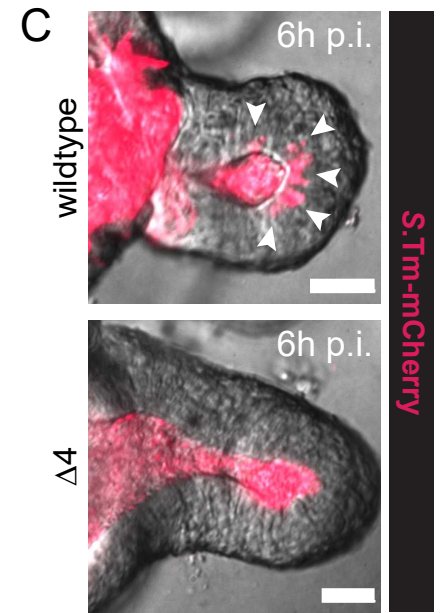

Supplement: inline-supplementary-material-7 [file inline-supplementary-material-7.pdf]
